# Supplementary material for: Cancer in General Responders Participating in World Trade Center Health Programs, 2003–2013
Source: Oxford University Press journal article supplement (doi:10.1093/jncics/pkz090), 2019-10-31
Supplement: pkz090_supplementary_data.pdf [file pkz090_supplementary_data.pdf]

# Supplemental Table 1.

Standardized incidence ratios (SIR) of selected cancers among World Trade Center Health

Program (WTCHP) responders, 2003-2013; effect of selection bias threshold on SIRs

| Site                             | Criteria             | Observed | Expected | SIR  | 95% CI      |
|----------------------------------|----------------------|----------|----------|------|-------------|
| All sites combined               | Unrestricted         | 1850     | 1432.4   | 1.29 | 1.23 - 1.35 |
|                                  | Restricted 6 months  | 1072     | 984.4    | 1.09 | 1.02 - 1.16 |
|                                  | Restricted 12 months | 1000     | 932.8    | 1.07 | 1.01 - 1.14 |
|                                  | Restricted 24 months | 876      | 826.2    | 1.06 | 0.99 - 1.13 |
| Smoking-related                  | Unrestricted         | 505      | 436.6    | 1.16 | 1.06 - 1.26 |
|                                  | Restricted 6 months  | 300      | 304.9    | 0.98 | 0.88 - 1.10 |
|                                  | Restricted 12 months | 285      | 289.3    | 0.99 | 0.87 - 1.11 |
|                                  | Restricted 24 months | 257      | 257.0    | 1.00 | 0.88 - 1.13 |
| Oral cavity and pharynx          | Unrestricted         | 66       | 51.3     | 1.29 | 0.99 - 1.64 |
|                                  | Restricted 6 months  | 34       | 35.3     | 0.96 | 0.67 - 1.34 |
|                                  | Restricted 12 months | 32       | 33.5     | 0.96 | 0.65 - 1.35 |
|                                  | Restricted 24 months | 29       | 29.7     | 0.98 | 0.65 - 1.40 |
| Digestive system                 | Unrestricted         | 271      | 260.2    | 1.04 | 0.92 - 1.17 |
|                                  | Restricted 6 months  | 163      | 180.2    | 0.90 | 0.77 - 1.05 |
|                                  | Restricted 12 months | 153      | 170.8    | 0.90 | 0.76 - 1.05 |
|                                  | Restricted 24 months | 136      | 151.4    | 0.90 | 0.75 - 1.06 |
| Esophagus                        | Unrestricted         | 26       | 18.7     | 1.39 | 0.91 - 2.04 |
|                                  | Restricted 6 months  | 19       | 13.0     | 1.46 | 0.88 - 2.28 |
|                                  | Restricted 12 months | 17       | 12.3     | 1.38 | 0.80 - 2.21 |
|                                  | Restricted 24 months | 17       | 10.9     | 1.56 | 0.91 - 2.49 |
| Stomach                          | Unrestricted         | 31       | 26.0     | 1.19 | 0.81 - 1.69 |
|                                  | Restricted 6 months  | 19       | 17.8     | 1.07 | 0.64 - 1.67 |
|                                  | Restricted 12 months | 19       | 16.8     | 1.13 | 0.68 - 1.76 |
|                                  | Restricted 24 months | 15       | 14.9     | 1.00 | 0.56 - 1.66 |
| Colon and rectum                 | Unrestricted         | 130      | 123.3    | 1.05 | 0.88 - 1.25 |
|                                  | Restricted 6 months  | 68       | 84.0     | 0.81 | 0.63 - 1.03 |
|                                  | Restricted 12 months | 61       | 79.4     | 0.77 | 0.59 - 0.99 |
|                                  | Restricted 24 months | 55       | 70.0     | 0.79 | 0.59 - 1.02 |
| Liver and intrahepatic bile duct | Unrestricted         | 29       | 35.3     | 0.82 | 0.55 - 1.18 |
|                                  | Restricted 6 months  | 24       | 25.2     | 0.95 | 0.61 - 1.42 |
|                                  | Restricted 12 months | 24       | 24.0     | 1.00 | 0.64 - 1.49 |
|                                  | Restricted 24 months | 19       | 21.4     | 0.89 | 0.53 - 1.39 |
| Pancreas                         | Unrestricted         | 26       | 31.9     | 0.81 | 0.53 - 1.19 |
|                                  | Restricted 6 months  | 18       | 23.0     | 0.78 | 0.46 - 1.24 |

|                                   |                      |     |       |      |             |
|-----------------------------------|----------------------|-----|-------|------|-------------|
|                                   | Restricted 12 months | 18  | 21.9  | 0.82 | 0.49 - 1.30 |
|                                   | Restricted 24 months | 17  | 19.6  | 0.87 | 0.51 - 1.39 |
| Nose, nasal cavity and middle ear | Unrestricted         | 5   | 2.7   | 1.85 | 0.60 - 4.32 |
|                                   | Restricted 6 months  | <5  |       | 1.14 |             |
|                                   | Restricted 12 months | <5  |       | 1.21 |             |
|                                   | Restricted 24 months | <5  |       | 1.38 |             |
| Larynx                            | Unrestricted         | 21  | 17.6  | 1.19 | 0.74 - 1.82 |
|                                   | Restricted 6 months  | 10  | 12.0  | 0.83 | 0.40 - 1.53 |
|                                   | Restricted 12 months | 9   | 11.3  | 0.79 | 0.36 - 1.51 |
|                                   | Restricted 24 months | 9   | 10.0  | 0.90 | 0.41 - 1.72 |
| Lung and bronchus                 | Unrestricted         | 131 | 138.2 | 0.95 | 0.79 - 1.12 |
|                                   | Restricted 6 months  | 80  | 96.2  | 0.83 | 0.66 - 1.04 |
|                                   | Restricted 12 months | 76  | 91.2  | 0.83 | 0.66 - 1.04 |
|                                   | Restricted 24 months | 71  | 81.0  | 0.88 | 0.68 - 1.11 |
| Soft tissue including heart       | Unrestricted         | 16  | 12.5  | 1.28 | 0.73 - 2.08 |
|                                   | Restricted 6 months  | 7   | 7.9   | 0.88 | 0.35 - 1.82 |
|                                   | Restricted 12 months | 7   | 7.5   | 0.94 | 0.38 - 1.93 |
|                                   | Restricted 24 months | 6   | 6.5   | 0.92 | 0.34 - 2.01 |
| Melanoma of the skin              | Unrestricted         | 82  | 64.6  | 1.27 | 1.01 - 1.58 |
|                                   | Restricted 6 months  | 50  | 43.3  | 1.15 | 0.86 - 1.52 |
|                                   | Restricted 12 months | 49  | 41.0  | 1.20 | 0.88 - 1.58 |
|                                   | Restricted 24 months | 42  | 36.1  | 1.16 | 0.84 - 1.57 |
| Breast                            | Unrestricted         | 88  | 76.1  | 1.16 | 0.93 - 1.42 |
|                                   | Restricted 6 months  | 47  | 50.3  | 0.94 | 0.69 - 1.24 |
|                                   | Restricted 12 months | 44  | 47.4  | 0.93 | 0.67 - 1.25 |
|                                   | Restricted 24 months | 36  | 41.4  | 0.87 | 0.61 - 1.20 |
| Corpus uteri                      | Unrestricted         | 15  | 13.9  | 1.08 | 0.60 - 1.78 |
|                                   | Restricted 6 months  | 8   | 9.8   | 0.82 | 0.35 - 1.61 |
|                                   | Restricted 12 months | 8   | 9.3   | 0.86 | 0.37 - 1.70 |
|                                   | Restricted 24 months | 7   | 8.2   | 0.85 | 0.34 - 1.76 |
| Prostate                          | Unrestricted         | 442 | 328.0 | 1.35 | 1.23 - 1.48 |
|                                   | Restricted 6 months  | 298 | 238.7 | 1.25 | 1.11 - 1.40 |
|                                   | Restricted 12 months | 279 | 227.5 | 1.23 | 1.09 - 1.38 |
|                                   | Restricted 24 months | 246 | 204.0 | 1.21 | 1.06 - 1.37 |
| Testis                            | Unrestricted         | 31  | 27.7  | 1.12 | 0.76 - 1.59 |
|                                   | Restricted 6 months  | 10  | 14.5  | 0.69 | 0.33 - 1.27 |
|                                   | Restricted 12 months | 8   | 13.3  | 0.60 | 0.26 - 1.18 |
|                                   | Restricted 24 months | 7   | 11.2  | 0.63 | 0.25 - 1.29 |
| Urinary bladder                   | Unrestricted         | 81  | 63.0  | 1.29 | 1.02 - 1.60 |
|                                   | Restricted 6 months  | 48  | 44.2  | 1.09 | 0.80 - 1.44 |
|                                   | Restricted 12 months | 48  | 41.9  | 1.14 | 0.84 - 1.52 |
|                                   | Restricted 24 months | 39  | 37.3  | 1.05 | 0.74 - 1.43 |
| Kidney and renal pelvis           | Unrestricted         | 105 | 66.6  | 1.58 | 1.29 - 1.91 |
|                                   | Restricted 6 months  | 54  | 46.7  | 1.16 | 0.87 - 1.51 |

|                                |                      |     |       |      |             |
|--------------------------------|----------------------|-----|-------|------|-------------|
|                                | Restricted 12 months | 50  | 44.3  | 1.13 | 0.84 - 1.49 |
|                                | Restricted 24 months | 47  | 39.3  | 1.20 | 0.88 - 1.59 |
| Brain and other nervous system | Unrestricted         | 30  | 25.1  | 1.19 | 0.81 - 1.71 |
|                                | Restricted 6 months  | 21  | 15.6  | 1.34 | 0.83 - 2.05 |
|                                | Restricted 12 months | 19  | 14.7  | 1.30 | 0.78 - 2.02 |
|                                | Restricted 24 months | 15  | 12.7  | 1.18 | 0.66 - 1.95 |
| Thyroid                        | Unrestricted         | 128 | 49.0  | 2.61 | 2.18 - 3.11 |
|                                | Restricted 6 months  | 73  | 33.4  | 2.19 | 1.71 - 2.75 |
|                                | Restricted 12 months | 69  | 31.6  | 2.18 | 1.70 - 2.76 |
|                                | Restricted 24 months | 59  | 27.9  | 2.11 | 1.61 - 2.72 |
| Hematological                  | Unrestricted         | 245 | 152.6 | 1.61 | 1.41 - 1.82 |
|                                | Restricted 6 months  | 106 | 100.6 | 1.05 | 0.86 - 1.27 |
|                                | Restricted 12 months | 97  | 94.9  | 1.02 | 0.83 - 1.25 |
|                                | Restricted 24 months | 79  | 83.5  | 0.95 | 0.75 - 1.18 |
| Hodgkin's lymphoma             | Unrestricted         | 19  | 15.2  | 1.25 | 0.75 - 1.95 |
|                                | Restricted 6 months  | 7   | 8.4   | 0.83 | 0.34 - 1.72 |
|                                | Restricted 12 months | 7   | 7.8   | 0.90 | 0.36 - 1.85 |
|                                | Restricted 24 months | 5   | 6.6   | 0.76 | 0.25 - 1.77 |
| Non-Hodgkin's lymphoma         | Unrestricted         | 104 | 74.9  | 1.39 | 1.13 - 1.68 |
|                                | Restricted 6 months  | 47  | 48.8  | 0.96 | 0.71 - 1.28 |
|                                | Restricted 12 months | 43  | 46.0  | 0.93 | 0.68 - 1.26 |
|                                | Restricted 24 months | 36  | 40.3  | 0.89 | 0.63 - 1.24 |
| Myeloma                        | Unrestricted         | 42  | 20.8  | 2.02 | 1.45 - 2.73 |
|                                | Restricted 6 months  | 12  | 15.0  | 0.80 | 0.41 - 1.40 |
|                                | Restricted 12 months | 11  | 14.3  | 0.77 | 0.39 - 1.38 |
|                                | Restricted 24 months | 10  | 12.7  | 0.78 | 0.38 - 1.44 |
| Leukemia                       | Unrestricted         | 80  | 41.6  | 1.92 | 1.53 - 2.39 |
|                                | Restricted 6 months  | 40  | 28.4  | 1.41 | 1.01 - 1.92 |
|                                | Restricted 12 months | 36  | 26.9  | 1.34 | 0.94 - 1.85 |
|                                | Restricted 24 months | 28  | 23.8  | 1.18 | 0.78 - 1.70 |
| CLL                            | Unrestricted         | 30  | 15.4  | 1.95 | 1.32 - 2.79 |
|                                | Restricted 6 months  | 12  | 11.1  | 1.08 | 0.56 - 1.89 |
|                                | Restricted 12 months | 10  | 10.5  | 0.95 | 0.45 - 1.74 |
|                                | Restricted 24 months | 8   | 9.4   | 0.85 | 0.37 - 1.67 |
| AML                            | Unrestricted         | 17  | 11.4  | 1.49 | 0.87 - 2.39 |
|                                | Restricted 6 months  | 12  | 7.6   | 1.58 | 0.82 - 2.76 |
|                                | Restricted 12 months | 10  | 7.2   | 1.39 | 0.67 - 2.56 |
|                                | Restricted 24 months | 8   | 6.4   | 1.26 | 0.54 - 2.48 |
| Mesothelioma                   | Unrestricted         | <5  |       | 1.74 |             |
|                                | Restricted 6 months  | <5  |       | 1.25 |             |
|                                | Restricted 12 months | <5  |       | 1.31 |             |
|                                | Restricted 24 months | <5  |       | 1.48 |             |

## **Supplemental Table 2.**

Cox proportional hazards models of selected cancers among World Trade Center Health Program (WTCHP) responders, 2003-2013; effect of selection bias threshold on hazard ratios

|                               | All Cancer Sites Combined |           |                         |           |                         |           | Prostate Cancer        |           |                         |           |                         |           |
|-------------------------------|---------------------------|-----------|-------------------------|-----------|-------------------------|-----------|------------------------|-----------|-------------------------|-----------|-------------------------|-----------|
|                               | Restricted<br>6 months    |           | Restricted<br>12 months |           | Restricted<br>24 months |           | Restricted<br>6 months |           | Restricted<br>12 months |           | Restricted<br>24 months |           |
|                               | HR                        | 95% CI    | HR                      | 95% CI    | HR                      | 95% CI    | HR                     | 95% CI    | HR                      | 95% CI    | HR                      | 95% CI    |
| <b>Sex</b>                    |                           |           |                         |           |                         |           |                        |           |                         |           |                         |           |
| Male                          | 1.21                      | 0.97-1.52 | 1.24                    | 0.98-1.56 | 1.27                    | 0.98-1.63 |                        |           |                         |           |                         |           |
| Female                        | 1.0                       | reference | 1.0                     | reference | 1.0                     | reference |                        |           |                         |           |                         |           |
| <b>Age on 9/11</b>            |                           |           |                         |           |                         |           |                        |           |                         |           |                         |           |
| Per year                      | 1.09                      | 1.08-1.10 | 1.09                    | 1.08-1.10 | 1.09                    | 1.08-1.10 | 1.13                   | 1.12-1.14 | 1.13                    | 1.11-1.14 | 1.13                    | 1.11-1.14 |
| <b>Occupation</b>             |                           |           |                         |           |                         |           |                        |           |                         |           |                         |           |
| Construction                  | 1.12                      | 0.92-1.36 | 1.13                    | 0.93-1.38 | 1.15                    | 0.93-1.43 | 1.22                   | 0.90-1.66 | 1.22                    | 0.88-1.67 | 1.26                    | 0.90-1.77 |
| Protective                    | 1.03                      | 0.84-1.26 | 1.07                    | 0.87-1.31 | 1.11                    | 0.89-1.39 | 1.09                   | 0.77-1.56 | 1.06                    | 0.74-1.53 | 1.14                    | 0.77-1.68 |
| CM&IRG                        | 0.96                      | 0.74-1.24 | 1.01                    | 0.78-1.31 | 1.05                    | 0.80-1.38 | 1.15                   | 0.76-1.74 | 1.23                    | 0.81-1.86 | 1.29                    | 0.82-2.02 |
| All other                     | 1.00                      | reference | 1.00                    | reference | 1.00                    | reference | 1.00                   | reference | 1.00                    | reference | 1.00                    | reference |
| <b>Smoking</b>                |                           |           |                         |           |                         |           |                        |           |                         |           |                         |           |
| Current smoker                | 1.29                      | 1.07-1.57 | 1.32                    | 1.09-1.61 | 1.34                    | 1.09-1.65 | 0.74                   | 0.50-1.10 | 0.74                    | 0.50-1.11 | 0.72                    | 0.47-1.10 |
| Former smoker                 | 1.00                      | 0.85-1.17 | 1.03                    | 0.87-1.21 | 1.05                    | 0.88-1.25 | 0.94                   | 0.73-1.21 | 0.90                    | 0.69-1.17 | 0.88                    | 0.66-1.16 |
| Never smoked                  | 1.00                      | reference | 1.00                    | reference | 1.00                    | reference | 1.00                   | reference | 1.00                    | reference | 1.00                    | reference |
| <b>SSN</b>                    |                           |           |                         |           |                         |           |                        |           |                         |           |                         |           |
| SSN sent to registry          | 0.95                      | 0.81-1.11 | 0.93                    | 0.79-1.09 | 0.93                    | 0.78-1.11 | 1.08                   | 0.84-1.40 | 1.10                    | 0.84-1.43 | 1.14                    | 0.86-1.51 |
| No SSN sent                   | 1.00                      | reference | 1.00                    | reference | 1.00                    | reference | 1.00                   | reference | 1.00                    | reference | 1.00                    | reference |
| <b>Derived exposure level</b> |                           |           |                         |           |                         |           |                        |           |                         |           |                         |           |
| Low                           | 1.00                      | reference | 1.00                    | reference | 1.00                    | reference | 1.00                   | reference | 1.00                    | reference | 1.00                    | reference |
| Medium                        | 0.91                      | 0.75-1.11 | 0.92                    | 0.75-1.12 | 0.92                    | 0.74-1.15 | 0.82                   | 0.60-1.12 | 0.80                    | 0.59-1.10 | 0.78                    | 0.56-1.09 |
| High                          | 0.99                      | 0.78-1.26 | 0.96                    | 0.75-1.23 | 0.95                    | 0.73-1.24 | 0.93                   | 0.64-1.36 | 0.87                    | 0.58-1.28 | 0.87                    | 0.58-1.32 |
| Very high                     | 0.67                      | 0.40-1.12 | 0.57                    | 0.33-1.01 | 0.60                    | 0.33-1.09 | 0.48                   | 0.17-1.33 | 0.49                    | 0.18-1.38 | 0.55                    | 0.20-1.54 |

|                         | All Cancer Sites Combined |           |                         |           |                         |           | Prostate Cancer        |           |                         |           |                         |           |
|-------------------------|---------------------------|-----------|-------------------------|-----------|-------------------------|-----------|------------------------|-----------|-------------------------|-----------|-------------------------|-----------|
|                         | Restricted<br>6 months    |           | Restricted<br>12 months |           | Restricted<br>24 months |           | Restricted<br>6 months |           | Restricted<br>12 months |           | Restricted<br>24 months |           |
|                         | HR                        | 95% CI    | HR                      | 95% CI    | HR                      | 95% CI    | HR                     | 95% CI    | HR                      | 95% CI    | HR                      | 95% CI    |
| <b>Dust exposure</b>    |                           |           |                         |           |                         |           |                        |           |                         |           |                         |           |
| <b>/arrival time</b>    |                           |           |                         |           |                         |           |                        |           |                         |           |                         |           |
| Direct                  | 1.07                      | 0.86-1.33 | 1.05                    | 0.84-1.32 | 1.04                    | 0.82-1.32 | 1.18                   | 0.82-1.69 | 1.13                    | 0.77-1.64 | 1.20                    | 0.80-1.80 |
| Significant             | 1.16                      | 0.93-1.46 | 1.24                    | 0.98-1.55 | 1.26                    | 0.99-1.61 | 1.43                   | 0.99-2.06 | 1.46                    | 1.01-2.12 | 1.56                    | 1.05-2.31 |
| Some                    | 0.86                      | 0.62-1.20 | 0.91                    | 0.65-1.27 | 0.97                    | 0.68-1.38 | 0.93                   | 0.52-1.66 | 0.91                    | 0.50-1.67 | 1.02                    | 0.54-1.91 |
| None/arrival 9/11- 9/14 | 1.06                      | 0.88-1.29 | 1.08                    | 0.89-1.32 | 1.06                    | 0.86-1.32 | 1.11                   | 0.80-1.54 | 1.12                    | 0.80-1.56 | 1.12                    | 0.78-1.61 |
| None/arrival after 9/14 | 1.00                      | reference | 1.00                    | reference | 1.00                    | reference | 1.00                   | reference | 1.00                    | reference | 1.00                    | reference |
| <b>Duration on site</b> |                           |           |                         |           |                         |           |                        |           |                         |           |                         |           |
| 1st quartile            | 1.00                      | reference | 1.00                    | reference | 1.00                    | reference | 1.00                   | reference | 1.00                    | reference | 1.00                    | reference |
| 2nd quartile            | 1.08                      | 0.88-1.32 | 1.09                    | 0.88-1.34 | 1.07                    | 0.85-1.33 | 1.13                   | 0.82-1.55 | 1.08                    | 0.78-1.50 | 0.98                    | 0.69-1.39 |
| 3rd quartile            | 0.99                      | 0.80-1.21 | 0.98                    | 0.79-1.21 | 0.99                    | 0.79-1.24 | 0.83                   | 0.59-1.16 | 0.80                    | 0.56-1.14 | 0.72                    | 0.49-1.05 |
| 4th quartile            | 1.04                      | 0.85-1.26 | 1.03                    | 0.84-1.26 | 1.09                    | 0.88-1.35 | 0.82                   | 0.60-1.14 | 0.82                    | 0.59-1.14 | 0.79                    | 0.56-1.12 |
| <b>Worked on Pile</b>   |                           |           |                         |           |                         |           |                        |           |                         |           |                         |           |
| Yes                     | 1.02                      | 0.88-1.19 | 1.00                    | 0.85-1.17 | 1.00                    | 0.84-1.18 | 0.95                   | 0.74-1.22 | 0.96                    | 0.74-1.25 | 0.98                    | 0.74-1.29 |
| No                      | 1.00                      | reference | 1.00                    | reference | 1.00                    | reference | 1.00                   | reference | 1.00                    | reference | 1.00                    | reference |
